# Supplementary material for: Effects of aging and macrophages on mice stem Leydig cell proliferation and differentiation in vitro
Source: PubMed Central journal article supplement (PMC10083278; doi:10.3389/fendo.2023.1139281), 2023-03-27
Supplement: DataSheet_1.pdf [file DataSheet_1.pdf]

**Supplementary Materials for Shao J et al., Effects of aging and macrophages on stem Leydig cells proliferation and differentiation in vitro**

**Supplementary Table S1: Antibodies information**

| Primary Antibody name                                | Dilutions | Vendor name                                    | Cat.No.         |
|------------------------------------------------------|-----------|------------------------------------------------|-----------------|
| CD51-PE                                              | 1:40      | eBioscience, San Diego, CA                     | 2087658         |
| F4/80-APC                                            | 1:20      | MultiSciences, Hangzhou, CHN                   | 70-AM048005-100 |
| CYP17A1                                              | 1:200     | Cell Signaling Technology, MA,<br>Boston, USA  | 94004           |
| HSD3B1                                               | 1:500     | Novus Biologicals, Littleton,<br>Colorado, USA | NB110-78644     |
| CD51                                                 | 1:500     | Abcam, Cambridge, UK                           | ab179475        |
| F4/80                                                | 1:500     | Abcam, Cambridge, UK                           | ab16911         |
| Dylight 488 conjugated of goat anti-Rat IgG (H+L)    | IF(1:400) | MultiSciences, Hangzhou, CHN                   | 060702          |
| Dylight 594 conjugated of goat anti-Rabbit IgG (H+L) | IF(1:400) | MultiSciences, Hangzhou, CHN                   | A00743          |
| Goat anti-Rabbit IgG-AlexaFlour 488                  | IF(1:500) | Absin, Shanghai, CHN                           | abs20025        |

**Supplementary Table S2: Primers information**

| Gene name | Forward sequence(5'to3') | Reverse sequence(5'to3')  |
|-----------|--------------------------|---------------------------|
| Cyp17a1   | ATCTTGGCTTGTATCAGAATG    | ACTTGGAAATGATAAAGGAAC     |
| Scarb1    | AGCGGGGTGTAGGGACTGGGT    | GTTCTGCCGTTGCTGTGGTTC     |
| Acta2     | TGAGACCTTCAATGTCCCCGC    | TCACACCATCTCCAGAGTCCAGC   |
| CD146     | ACAGCCACGATGACCACA       | ATACCTGACTCCAGCCAAAC      |
| CD31      | AGCACCGAAGTACCATT        | CAGATAAGCCCACCAGAG        |
| DDX4      | TAAAAGGGTTTGGCGTTGTTC    | CCAGTTTGGTCATTCAAGTTCG    |
| nestin    | CCTCAACCCTCACCCTCTATTT   | TCCAGACCACTTTCTTGTATTTCC  |
| Coup-TF2  | ACCTACCAAACGGACGAAAA     | TGCCTGTGGTCTGTCTGATG      |
| PDGFRa    | ACTCGCTGGTCTTGAACG       | CTGGTGCCTGCCTCCTAT        |
| ADGRE1    | TCGATGTCTAGGTACTCCGTC    | CTGTGGAAAGCACCATGTTAG     |
| CD115     | CAGGGTCCAAGGTCCAGTAGG    | TGGTTGTAGAGCCGGGTGAAA     |
| TNF-a     | CTTGTTGCCTCCTCTTTTGCTTA  | CTTTATTTCTCTCAATGACCCGTAG |
| IL-6      | TCACAGAAGGAGTGGCTAAGGACC | ACGCACTAGGTTTGCCGAGTAGAT  |
| IL-8      | TGTTACAGGTGACTGCTCC      | AGCCCATAGTGGAGTGGGAT      |
| IL-1b     | TGTGTTTTCTCCTTGCCTCTGAT  | TGCTGCCTAATGTCCCCTTGAAT   |
| Lhcgr     | TTAGCCAAATCAACACCCTAA    | GTTACACCAAGACACTCCAAT     |
| Star      | TGAGTGATGACCGTGTCTTTT    | GGGACGAAGTGCTAAGTAAGA     |
| Cyp11a1   | GAAGTCTGGAGGCAGGTTGAG    | ACCTATTCCGCTTTTCTTTG      |
| Hsd3b1    | TTTTCTGCTTTGCTTCTCCTCC   | CCTTCTCTGCCCCTGCTCTA      |
| Hsd17b3   | TGAGCAAGGCAGCCACAGGAT    | GATGACCAAGACCGCCGATGA     |
| Gli1      | GACTTTCTGGTCTGCCCTTTT    | AGCCCGCTTCTTTGTAAATTTGA   |
| Gli2      | GGGACTCTTTAGCCTCGCAG     | CCACAGGGTTGAGGTAGTCAT     |
| Gli3      | GAAGAAACGCAATCACTATGCAG  | GTCCCACGGTAAGGGAGAGA      |
| PDGFRb    | AGGCTTGCTTCTCGCTAC       | ATCTACGTGGACCCTGTGC       |
| Tagln     | CCAACAAGGGTCCATCCTACG    | ATCTGGGCGGCCTACATCA       |
| Lyz2      | ATGGAATGGCTGGCTACTATGG   | ACCAGTATCGGCTATTGATCTGA   |
| Lipe      | GACTATGGGTGACGTGTAGAG    | AAGCCAAAGATGAAGTGAGAC     |
| CD45      | GTTTTCGCTACATGACTGCACA   | AGGTTGTCCAACCTGACATCTTTC  |
| CD51      | CGGGTCCCAGAGGGAAGTTA     | TGGATGAGCATTACATTTGAGA    |
| TCF-21    | CTCCCTGAAAGTGGACTCCAA    | CGGGCTTTTCTTAGTGGGC       |
| CD105     | AGGGGTGAGGTGACGTTTAC     | GTGCCATTTTGTCTGGATGC      |
| CD73      | CCTGCACACAAACGACGTG      | CTGGTCTCCGGCATCCAAAA      |
| Notch1    | CCCTTGCTCTGCCTAACGC      | GGAGTCTGGCATCGTTGG        |
| Notch2    | GAGAAAACCGCTGTCAGAATGG   | GGTGGAGTATTGGCAGTCCTC     |
| Notch3    | AGTGCCGATCTGGTACAACCT    | CACTACGGGGTTCTCACACA      |
| Hes1      | TCAACACGACACCGGACAAAC    | ATGCCGGGAGCTATCTTTCTT     |
| Ptch1     | GCCTTCGCTGTGGGATTAAG     | CTTCTCCTATCTTCTGACGGGT    |
| Ptch2     | GGTCCCTCCGCACCTCATATC    | GTCTGTCTCAATTACAGCCACTC   |
| Smo       | GTGCTGTCTACATGCCCAAGT    | GCAACGCAGAAAGTCAGGC       |
| Sufu      | CGGACCCCTTGGACTATGTTA    | CTTCAGACGAAACGTCAACTCA    |
| Desmin    | CAATCTCGCAGGTGTAGGA      | ACTCAGGCAGCCAATAAGA       |

|        |                         |                         |
|--------|-------------------------|-------------------------|
| CD44   | AGAAAAATGGCCGCTACAGTATC | TGCATGTTTCAAACCCTTGC    |
| CD14   | CTCTGTCCTTAAAGCGGCTTAC  | GTTGCGGAGGTTCAAGATGTT   |
| CD34   | CTGGGTAGCTCTCTGCCTGAT   | TGGTAGGAACTGATGGGGATATT |
| CD90   | GCTAGGGTAAGGACCTTGATAT  | GCCGCCATGAGAATAACA      |
| P75NTR | CAACCACAGCAGCCAAGAT     | GCCGATACGGTGACCACT      |
| Ccnd1  | TGACTGCCGAGAAGTTGTGC    | CTCATCCGCCTCTGGCATT     |
| IL-1a  | ATCCAAACTGTCCCTCCA      | GGGGCTTTATCATCCTCA      |
| INSL3  | GGCTAGAGCAGAGACATC      | GGACACAGACCCAACAGG      |
| C1qb   | CGTCGGCCCTAAGGGTACT     | GGGGCTGTTGATGGTCCTC     |
| Rgs5   | GGGTTGCCTGTGAGAATTACA   | TGAAGTGGTCAATGTTACCTCT  |
| Rps16  | TTTGAGATGGACTGTTCGGATG  | AAGTTACTGGAGCCTGTTTTG   |

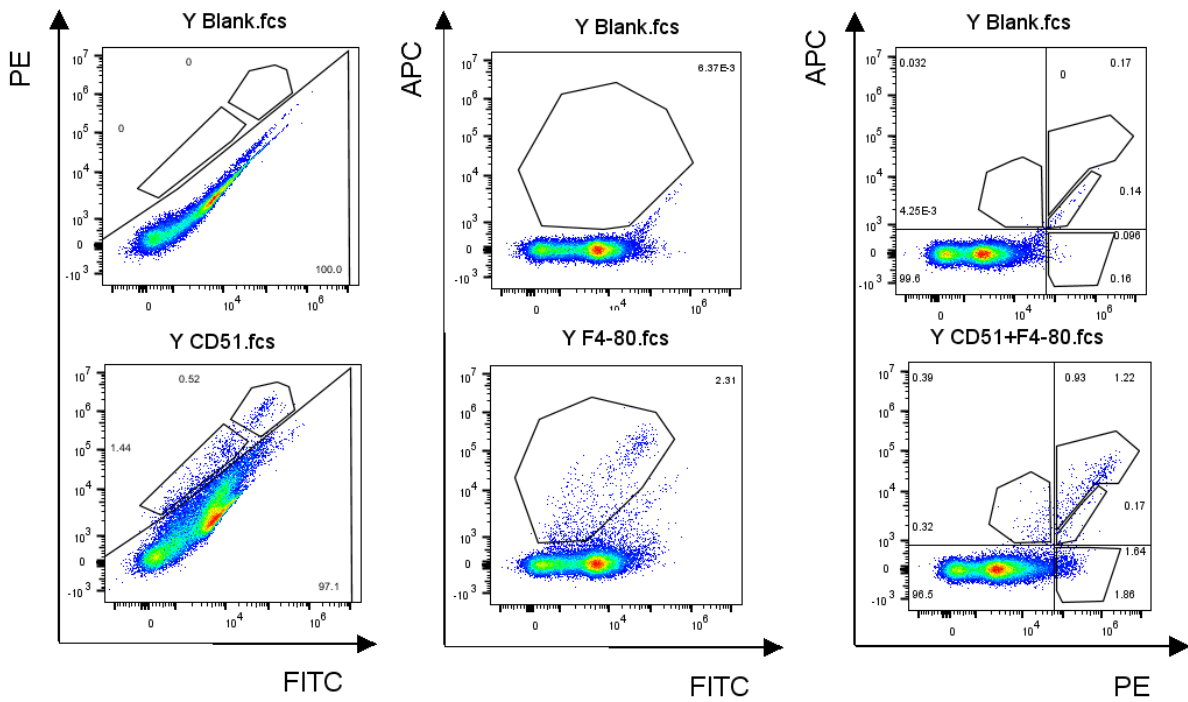

**Supplementary Fig S1:** Flow cytometry analysis of testicular cells of young adult mouse co-stained with CD51-PE and F4/80-APC antibodies. Top: Unstained cells; Bottom: Cells co-stained with CD51 and F4/80-APC antibodies. Cells were displayed by PE/FITC (left panel), APC/FITC (middle panel) or PE/APC (right-panel) channels. The bottom-right diagram shows that the cells with co-staining of the two antibodies represent 1.93% of the total cell population.

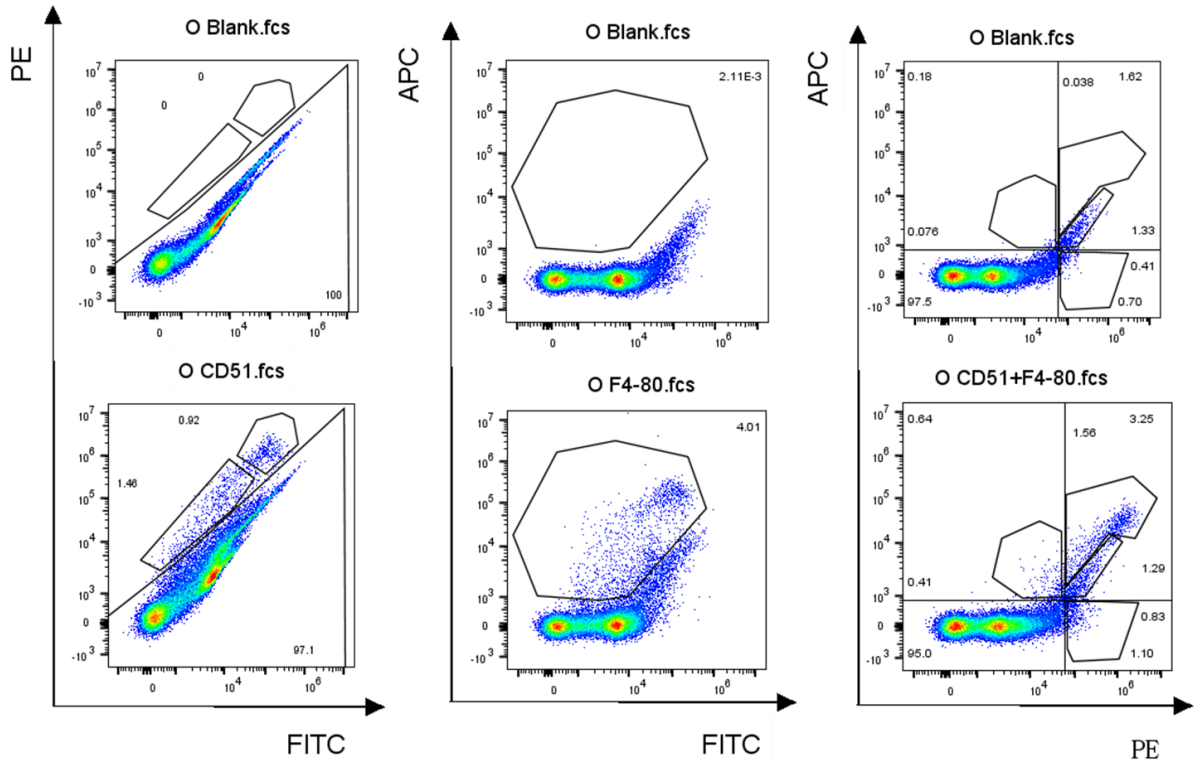

**Supplementary Fig S2:** Flow cytometry analysis of testicular cells of old mouse co-stained with CD51-PE and F4/80-APC antibodies. Top: Unstained cells; Bottom: Cells co-stained with CD51 and F4/80-APC antibodies. Cells were displayed by PE/FITC (left panel), APC/FITC (middle panel) or PE/APC (right-panel) channels. The bottom-right diagram shows that the cells with co-staining of the two antibodies represent 3.01% of the total cell population.

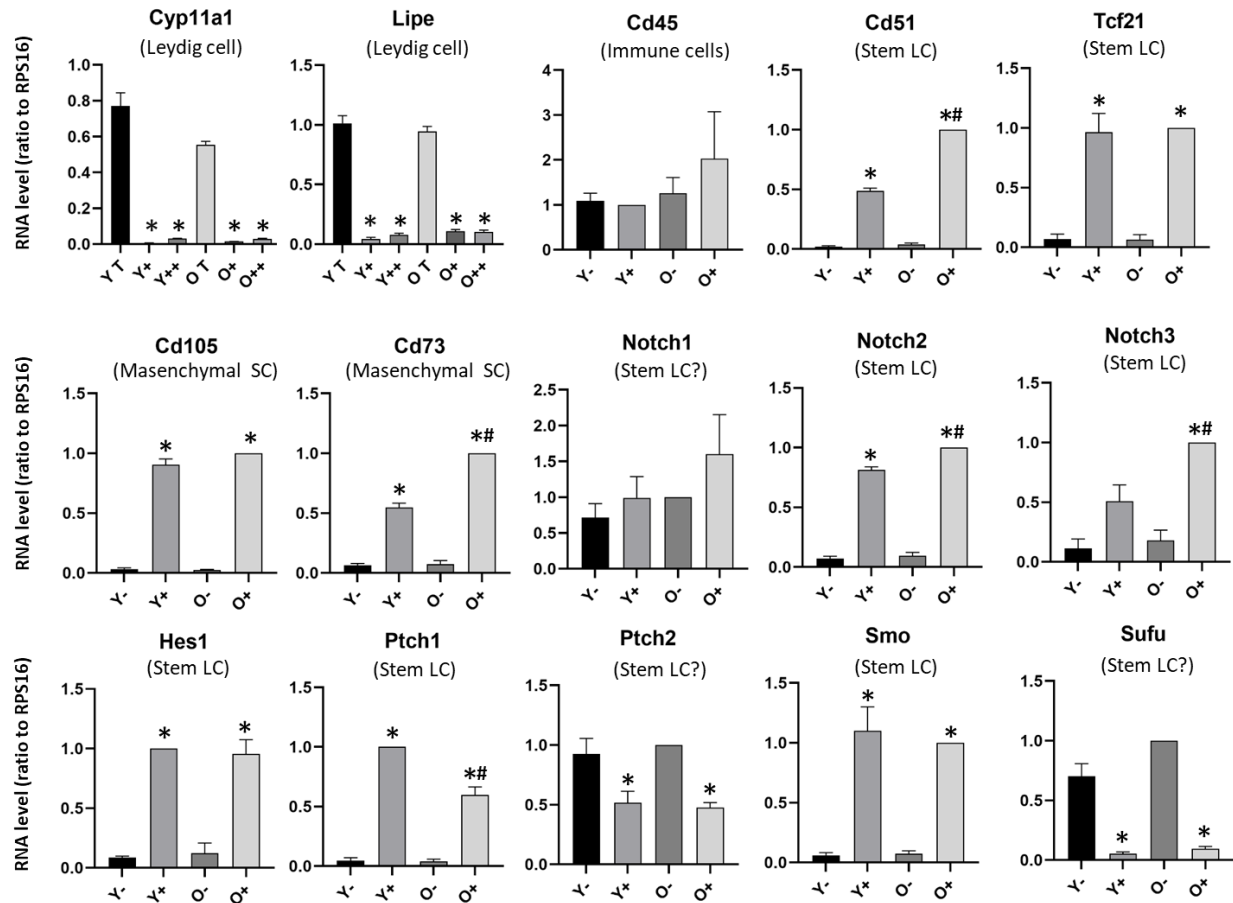

**Supplementary Fig S3.** Expressions of testicular cell marker genes by the isolated CD51 positive cells of the young and old testes. RNAs from whole testis (YT or OT) or CD51-negative cells (Y- or O-) were used as controls. Genes include Cyp11a1 and Lipe (Leydig cells), CD45 (immune cells), all others (stem Leydig cell, Stem LC). The data is expressed as mean  $\pm$  SEM of cells from three individual experiments. \*,#Significantly different from the age-matched YT/OT or Y-/O- controls (\*) or from same cell types of young animals (#) at  $P < 0.05$  respectively.

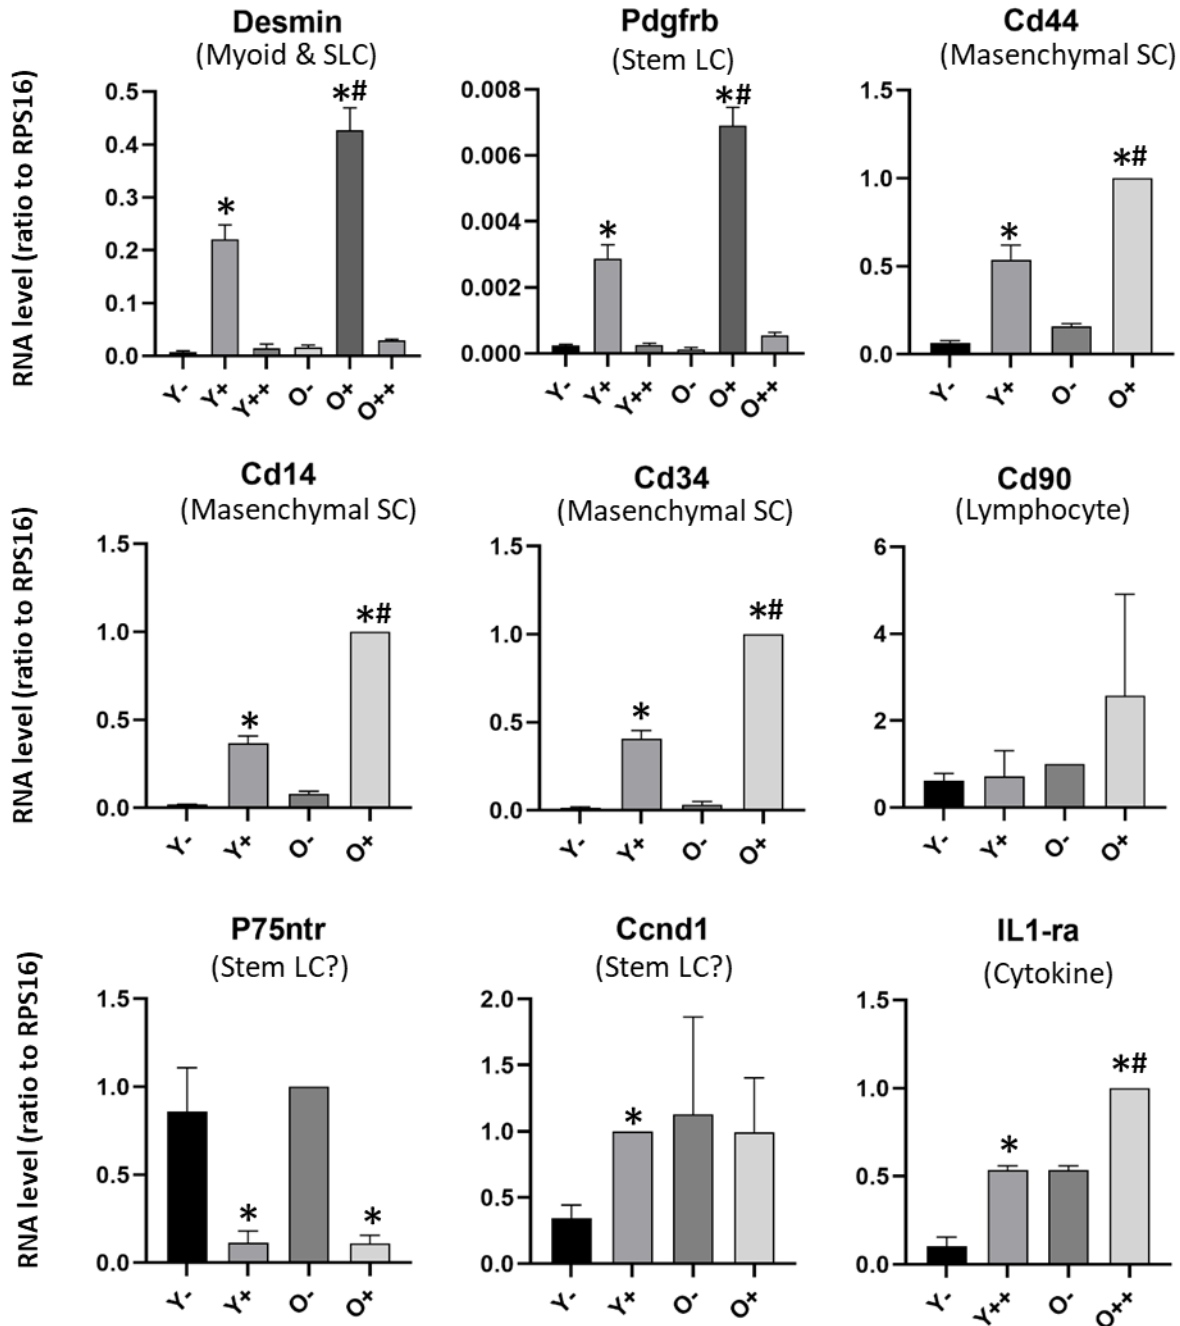

**Supplementary Fig S4.** Expressions of marker genes of stem Leydig cells (Stem LC, SLC) or general mesenchymal stem cells (Mesenchymal SC) by the isolated CD51 positive cells of the young and old testes. RNAs from CD51-negative (Y<sup>-</sup> or O<sup>-</sup>), weakly positive (Y<sup>+</sup> or O<sup>+</sup>) and strongly positive (Y<sup>++</sup> or O<sup>++</sup>) cells were analyzed. SC: stem cell. The data is expressed as mean  $\pm$  SEM of cells from three individual experiments. \*, #Significantly different from the age-matched Y<sup>-</sup>/O<sup>-</sup> cells (\*) or from same cell types of young animals (#) at  $P < 0.05$  respectively.

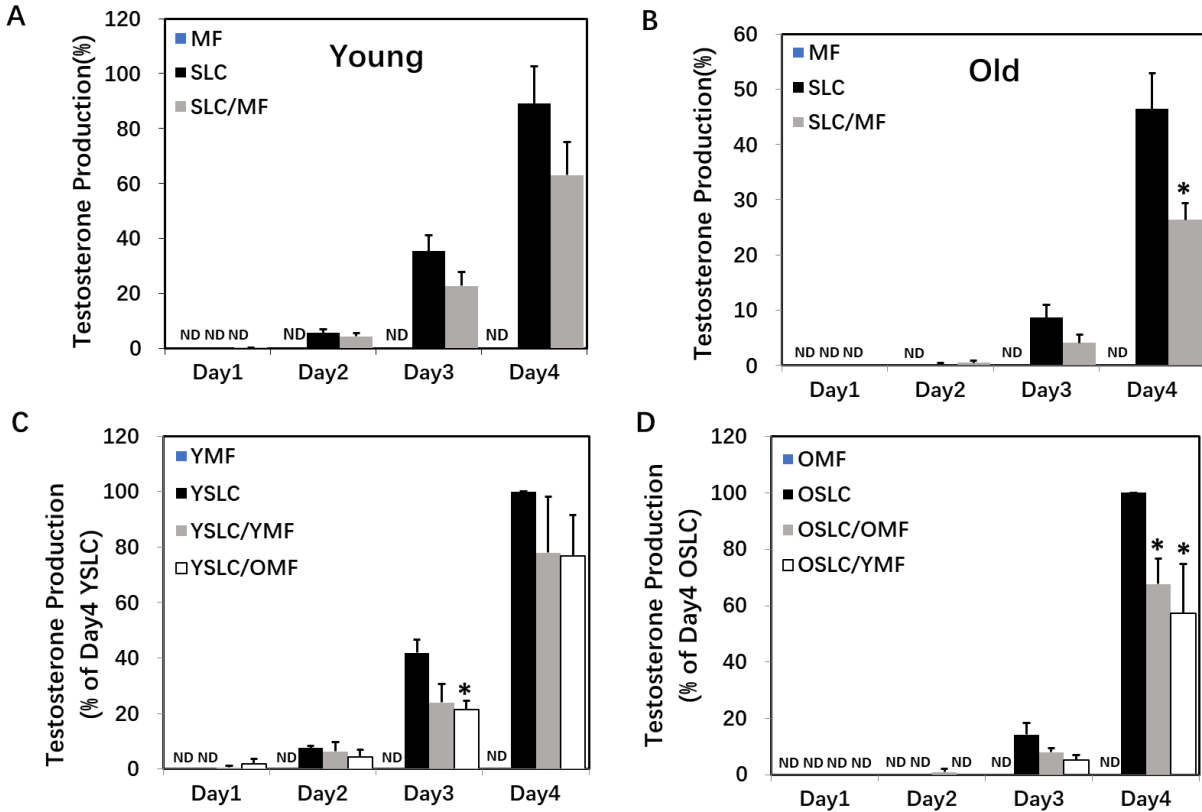

**Supplementary Fig S5.** Effect of aging on the interactions between SLCs and macrophages. (A, B) Testosterone production by individually cultured (MF or SLC) or co-cultured (SLC/MF) cells in the presence of differentiating inducing medium. (C, D) Percentage of testosterone productions by individually cultured cells (YMF, YSLC, OMF or OSLC) or co-cultured cells within same age (YSLC/YMF or OSLC/OMF) or across different ages (YSLC/OMF or OSLC/YMF) in the presence of differentiating inducing medium. The data were derived from Figure 7 and were normalized by cell numbers. Data are expressed as mean  $\pm$  SEM of 3-7 individual experiments. (ND) not detected. \*Significantly different from the time-matched SLC controls at  $P < 0.05$  respectively.



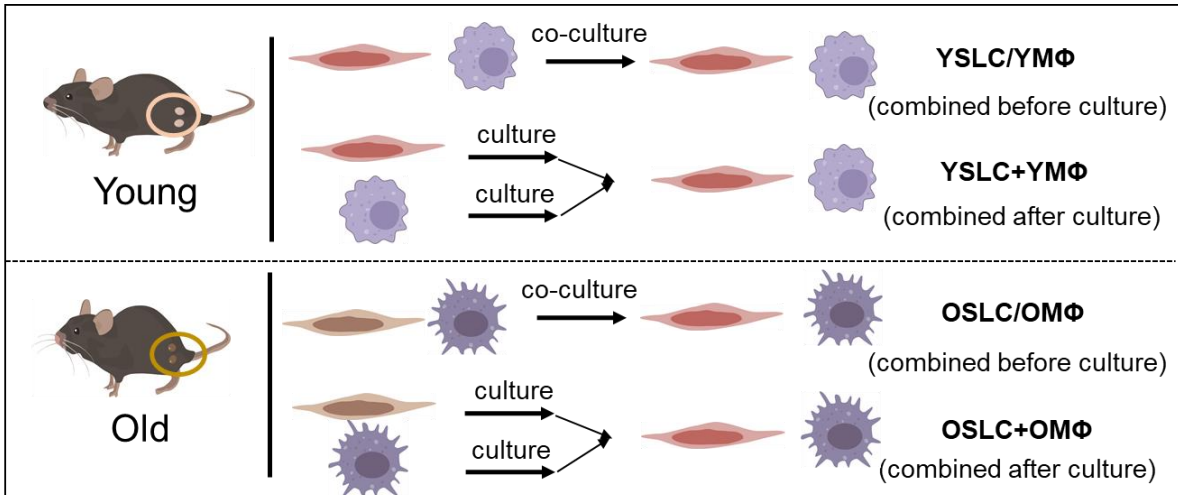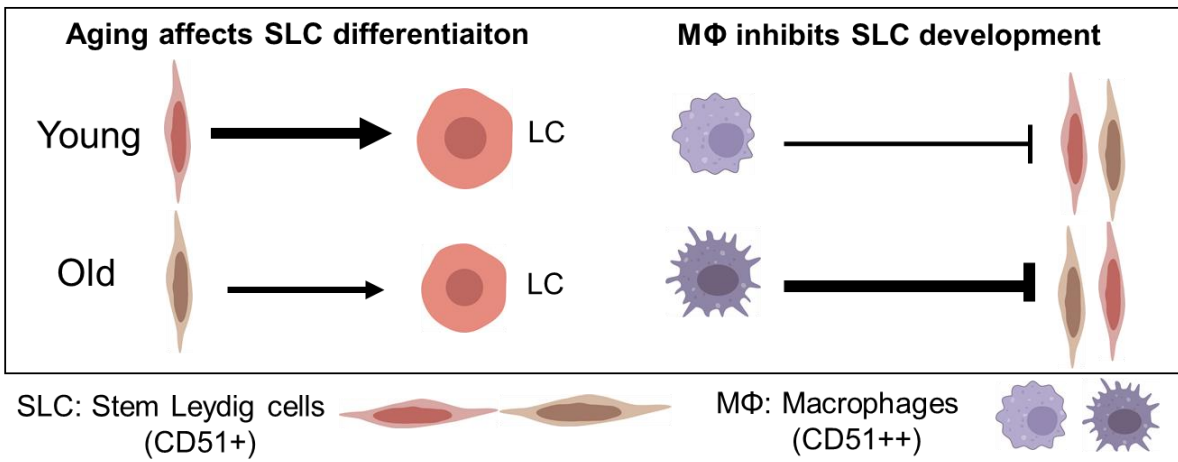

Supplementary Fig S6. Graphic summary of the study design and results.
